# Supplementary material
Source: PubMed Central journal article supplement (PMC5833186)
Supplement: DS_10.1177_0022034517744556.pdf [file DS_10.1177_0022034517744556.pdf]

## **A Force on the Crown and Tug of War in the Periodontal Complex**

A.T. Jang, L. Chen, A.R. Shimotake, W. Landis, V. Altoe, S. Aloni, M. Ryder, and S.P. Ho

### **Appendix**

**Limitations and Future Work:** **1.** Results in this review are limited to relationship between tooth-bone biomechanics and local mechanobiological events within a dentoalveolar complex loaded under physiological conditions, and that these results should be revisited in the context of biomechanics of the entire oral and craniofacial masticatory complex. **2.** A limitation of imaging *in situ* using an intact dentoalveolar fibrous joint is that it does not account for hydrostatic pressures (Herring 2012). However, *ex vivo* modeling is able to distinguish differences between joints adapted to various types of prolonged functional loads (Jang et al. 2015). Furthermore, once fabricated, biosensors can aid in providing bite forces in *in vivo* models and when paired with *in situ* experiments will provide accurate information on the travel of forces from the tooth-crown into the periodontal complex. **3.** Modeling *in situ* can be improved through interdigitation of maxillary and mandibular teeth within the integrated masticatory complex (Fig. 2) for an accurate representation of the tooth-bone association. **4.** Increased signal to noise ratio of acquired X-ray tomograms of the PDL-space between mineralized bone and tooth related tissues would enable an accurate representation of the size of the tether between cementum and alveolar bone, and thereby modeling of the periodontal complex. **5.** Colocalization of molecules and clusters of molecules within intact specimens that contain mineralized tissues in 3D-space must be performed. Therefore, correlative microscopy approach will enable accurate extraction of the mechanistic link between joint-level biomechanics to site-specific tissue-level mechanobiological processes.

**Appendix Table 1.** Previous works by others related to load-mediated adaptation of the dentoalveolar complex and respective outcomes mostly in rats

| Author                     | Loading Regime                 | Methods                                                                         | Outcome measures to identify adaptations                                                                     | Year |
|----------------------------|--------------------------------|---------------------------------------------------------------------------------|--------------------------------------------------------------------------------------------------------------|------|
| (Tomes 1882)               | as per habitat                 | species specific (a variety of mammals)/environment based foods                 | morphology of tooth, jaw and muscles                                                                         | 1882 |
| (Hiimae 1967)              | physiologic                    | consistencies – various food types given to rats (electromyograms, radiographs) | altered form and function of the masticatory system                                                          | 1967 |
| (Bondevik 1980)            | therapeutic (intrusive forces) | orthodontic appliance in rats (histology, radiography)                          | narrowing of PDL-space, cell free zones - recovery after 1-2 weeks                                           | 1980 |
| (Thomas and Peyton 1983)   | physiologic                    | soft diet – pudding given to rats (electromyography)                            | decreased bite force,                                                                                        | 1983 |
| (Kiliaridis et al. 1985)   | physiologic                    | soft diet - food mixed with water given to rats (electromyography)              | skull became more orthocranial in shape - no change in skull volume - decrease growth rate of angle mandible | 1985 |
| (King et al. 1991)         | therapeutic                    | springs placed in rats (radiography, and histomorphometry)                      | dental drift complementary to loads                                                                          | 1991 |
| (Alhashimi et al. 2000)    | therapeutic                    | ortho spring in rats (histomorphometry, immunohistochemistry)                   | change in expression of IL-1 $\beta$ , IL-6, TNF- $\alpha$                                                   | 2000 |
| (Ren et al. 2003)          | therapeutic                    | orthodontic spring in rats (radiography)                                        | age-related tooth movement                                                                                   | 2003 |
| (Mavropoulos et al. 2004b) | pathologic                     | porridge (bite block) in rats (radiography)                                     | altered bone volume density                                                                                  | 2004 |
| (Mavropoulos et al. 2004a) | pathologic                     | bite block in rats (radiography)                                                | shifts in mandibular growth                                                                                  | 2004 |

| <b>Author</b>           | <b>Loading Regime</b> | <b>Methods</b>                                            | <b>Adaptations</b>                                                                                                                            | <b>Year</b> |
|-------------------------|-----------------------|-----------------------------------------------------------|-----------------------------------------------------------------------------------------------------------------------------------------------|-------------|
| (Enokida et al. 2005)   | pathologic            | hypofunction - recovery (bite plates on incisors) in rats | change in histomorphometry and RANKL distribution                                                                                             | 2005        |
| (Wada et al. 2008)      | pathologic            | Hypofunction in rats                                      | elastic property and bone formation (fluorochrome)                                                                                            | 2008        |
| (Kingsmill et al. 2010) | physiologic           | soft diet - powdered chow as paste given to rats          | decreased bone volume, mineral density, alcian blue staining (GAG)                                                                            | 2010        |
| (Niver et al. 2011)     | physiologic           | soft diet – powder diet given to rats                     | decreased attenuation lines ( $\mu$ -XCT) , decreased hardness (microindentation)                                                             | 2011        |
| (Jiang et al. 2017)     | physiologic           | soft/powdery diet and hard diet given to rats             | role of vascular endothelial growth factor expression in temporomandibular joint development and remodeling in response to functional loading | 2017        |

**Appendix Table 2.** Previous works by others related to experimental mechanics to map strains within tissues of teeth, periodontal complex and their interfaces

| <b>Author</b>          | <b>Method</b>                                                                                                     | <b>Outcome measure</b>                                                                             | <b>Year</b> |
|------------------------|-------------------------------------------------------------------------------------------------------------------|----------------------------------------------------------------------------------------------------|-------------|
| Wang and Weiner 1998   | Moiré Interferometry on human tooth structures                                                                    | Strain maps as related to human tooth structures                                                   | 1998        |
| Asundi and Kishen 2000 | Strain gages and photoelastic materials simulating premolars                                                      | Mechanical strains within the simulated interfaces, and teeth                                      | 2000        |
| Jantarat et al., 2001  | Mechanical testing on extracted human maxillary premolars                                                         | Tooth deformation as related to percent moisture                                                   | 2001        |
| Wood et al., 2003      | Moiré Interferometry on human teeth                                                                               | Cuspal displacement and subsequent recovery – time and load-dependent properties using human teeth | 2003        |
| Popowics et al., 2004  | Mechanical testing on porcine mandibular molars                                                                   | Load-displacement curves as related to biomechanics of the molar periodontal complex               | 2004        |
| Zaslansky et al., 2005 | Speckle interferometry on human dentin                                                                            | Mechanical strain and Young's modulus of human dentin                                              | 2005        |
| Qian et al., 2009      | Digital image correlation and finite element methods on porcine dentoalveolar complex                             | Time dependent viscoelastic behavior of the tooth, the periodontal ligament and interfaces         | 2009        |
| Zhang et al., 2009     | Digital image correlation of human teeth                                                                          | Strain maps as a result of percent moisture in dentin and enamel                                   | 2009        |
| Naveh et al., 2012     | <i>In situ</i> loading device coupled to an X-ray computed tomography unit on porcine/rat dentoalveolar complexes | Visualization of tooth translation relative to bone                                                | 2012        |

|                   |                                                                                                                                                                                |                                                                                                                                                                                  |      |
|-------------------|--------------------------------------------------------------------------------------------------------------------------------------------------------------------------------|----------------------------------------------------------------------------------------------------------------------------------------------------------------------------------|------|
| Lin et al., 2013  | <i>In situ</i> loading device coupled to an X-ray computed tomography unit and digital image correlation to generate deformation maps in human and rat dentoalveolar complexes | Visualization of function: displacements of tooth in three-dimensional space relative to alveolar socket                                                                         | 2013 |
| Jang et al., 2015 | <i>In situ</i> loading device coupled to an X-ray computed tomography unit and digital volume correlation to generate deformation maps on rat dentoalveolar complex            | Visualization of function: deformations within the periodontal spaces – narrowed and widened spaces resulting from experimental tooth movement and/or loading on the tooth-crown | 2015 |

## REFERENCES

- Alhashimi N, Frithiof L, Brudvik P, Bakhiet M. 2000. Orthodontic movement induces high numbers of cells expressing ifn-gamma at mrna and protein levels. *Journal of interferon & cytokine research : the official journal of the International Society for Interferon and Cytokine Research*. 20(1):7-12.
- Bondevik O. 1980. Tissue changes in the rat molar periodontium following application of intrusive forces. *European journal of orthodontics*. 2(1):41-49.
- Enokida M, Kaneko S, Yanagishita M, Soma K. 2005. Influence of occlusal stimuli on the remodelling of alveolar bone in a rat hypofunction-recovery model. *Journal of Oral Biosciences*. 47:321-334.
- Herring SW. 2012. Mineralized tissues in oral and craniofacial science: Biological principles and clinical correlates. McCauley LK, Somerman MJ, editors.
- Hiiemae KM. 1967. Masticatory function in the mammals. *Journal of dental research*. 46(5):883-893.
- Jang AT, Merkle A, Fahey K, Gansky SA, Ho SP. 2015. Multiscale biomechanical responses of adapted bone-periodontal ligament-tooth fibrous joints. *Bone*. 81:196-207.
- Jiang L, Xie Y, Wei L, Zhou Q, Shen X, Jiang X, Gao Y. 2017. Identification of the vascular endothelial growth factor signalling pathway by quantitative proteomic analysis of rat condylar cartilage. *FEBS open bio*. 7(1):44-53.
- Kiliaridis S, Engstrom C, Thilander B. 1985. The relationship between masticatory function and craniofacial morphology. I. A cephalometric longitudinal analysis in the growing rat fed a soft diet. *European journal of orthodontics*. 7(4):273-283.
- King GJ, Keeling SD, McCoy EA, Ward TH. 1991. Measuring dental drift and orthodontic tooth movement in response to various initial forces in adult rats. *American journal of orthodontics and dentofacial orthopedics : official publication of the American Association of Orthodontists, its constituent societies, and the American Board of Orthodontics*. 99(5):456-465.
- Kingsmill VJ, Boyde A, Davis GR, Howell PGT, Rawlinson SCF. 2010. Changes in bone mineral and matrix in response to a soft diet. *Journal of dental research*. 89:510-514.
- Mavropoulos A, Bresin A, Kiliaridis S. 2004a. Morphometric analysis of the mandible in growing rats with different masticatory functional demands: Adaptation to an upper posterior bite block. *European journal of oral sciences*. 112(3):259-266.

- Mavropoulos A, Kiliaridis S, Bresin A, Ammann P. 2004b. Effect of different masticatory functional and mechanical demands on the structural adaptation of the mandibular alveolar bone in young growing rats. *Bone*. 35(1):191-197.
- Niver EL, Leong N, Greene J, Curtis D, Ryder MI, Ho SP. 2011. Reduced functional loads alter the physical characteristics of the bone-periodontal ligament-cementum complex. *Journal of periodontal research*. 46(6):730-741.
- Ren Y, Maltha JC, Kuijpers-Jagtman AM. 2003. Optimum force magnitude for orthodontic tooth movement: A systematic literature review. *The Angle orthodontist*. 73(1):86-92.
- Thomas NR, Peyton SC. 1983. An electromyographic study of mastication in the freely-moving rat. *Archives of oral biology*. 28:939-945.
- Tomes CA. 1882. *A manual of dental anatomy human and comparative*. London: J. & A. Churchill.
- Wada H, Hosomichi J, Shimomoto Y, Soma K. 2008. Influence of occlusal hypofunction on the elastic property and bone formation of rat alveolar bone. *Orthodontic Waves*. 67:9-14.
